# Supplementary material for: Decomposition of nitrous oxide on Fe-doped boron nitride nanotubes: the ligand effect
Source: Royal Society of Chemistry journal article supplement (doi:10.1039/c4cp02728k), 2014-09-16
Supplement: c4cp02728k1.pdf [file c4cp02728k1.pdf]

ARTICLE

## Decomposition of Nitrous Oxide on Fe-doped Boron Nitride Nanotubes: The Ligand Effect

Cite this: DOI: 10.1039/x0xx00000x

Natcha Injan,<sup>a</sup> Jakkapan Sirijaraensre<sup>b</sup> and Jumras Limtrakul<sup>\*bc</sup>

**Table S1.** Electronic energies with zero-point energy (ZPE) and computed  $\langle S^2 \rangle$  values of various spin states of Fe<sub>(B)</sub>-BNNT and Fe<sub>(N)</sub>-BNNT.

| System                  | Spin multiplicity | Relative energy<br>(kcal mol <sup>-1</sup> ) | $\langle S^2 \rangle$ | $\langle S^2 \rangle_{\text{cont}}^a$ |
|-------------------------|-------------------|----------------------------------------------|-----------------------|---------------------------------------|
| Fe <sub>(B)</sub> -BNNT | doublet           | 52.1                                         | 0.7890                | 5.20                                  |
|                         | quartet           | 11.2                                         | 3.7523                | 0.06                                  |
|                         | sextet            | 0.00                                         | 8.7501                | 0.00                                  |
| Fe <sub>(N)</sub> -BNNT | doublet           | 0.00                                         | 0.7861                | 4.81                                  |
|                         | quartet           | 10.1                                         | 3.7591                | 0.24                                  |
|                         | sextet            | 24.0                                         | 8.7503                | 0.00                                  |

<sup>a</sup> The percent spin contamination  $\langle S^2 \rangle_{\text{cont}} = [\langle S^2 \rangle - S(S+1)]100/[S(S+1)]$

**Table S2.** Partial natural charges of the adsorption complex ( $q_{\text{Ads}}$ ) and charge-transfer of all species in the adsorption complexes ( $\Delta q_{\text{Ads}}$ ) and transition states ( $\Delta q_{\text{TS}}$ ).<sup>a</sup>

| System                                           | $q_{\text{Ads}}$ |        |                  | $\Delta q_{\text{Ads}}$ |        |                  | $\Delta q_{\text{TS}}$ |        |                  |
|--------------------------------------------------|------------------|--------|------------------|-------------------------|--------|------------------|------------------------|--------|------------------|
|                                                  | tube             | Fe     | N <sub>2</sub> O | tube                    | Fe     | N <sub>2</sub> O | tube                   | Fe     | N <sub>2</sub> O |
| sextet Fe <sub>(B)</sub> -BNNT:N <sub>2</sub> O  | -1.333           | 1.241  | 0.091            | -0.037                  | -0.055 | 0.091            | 0.548                  | -0.069 | -0.479           |
| doublet Fe <sub>(N)</sub> -BNNT:N <sub>2</sub> O | 0.357            | -0.039 | -0.318           | 0.442                   | -0.083 | -0.360           | 0.026                  | -0.007 | -0.019           |

<sup>a</sup> calculated from equations  $\Delta q_{\text{Ads}} = q_{\text{Ads}} - q_{\text{iso}}$  and  $\Delta q_{\text{TS}} = q_{\text{TS}} - q_{\text{Ads}}$  where  $q_{\text{Ads}}$ ,  $q_{\text{TS}}$  and  $q_{\text{iso}}$  are charges of all species in the adsorption complexes, the transition states and the isolated N<sub>2</sub>O and nanotubes, respectively.

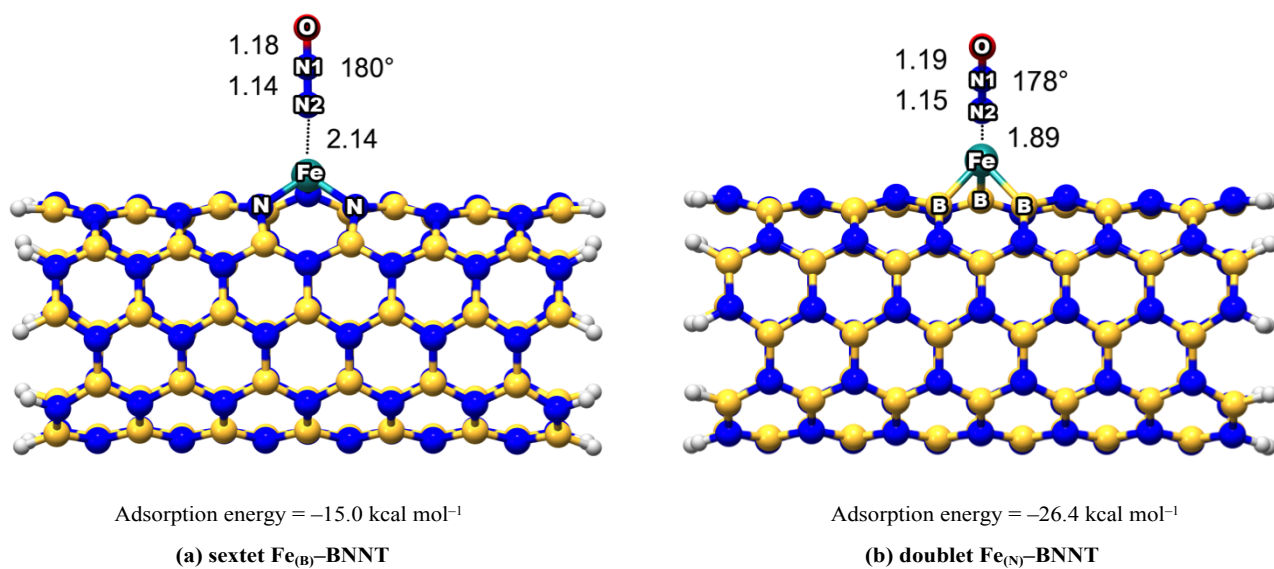

**Fig. S1** Geometrical structures and adsorption energy with ZPE correction of N-bound complexes over (a) sextet  $\text{Fe}_{(\text{B})}$ -BNNT and (b) doublet  $\text{Fe}_{(\text{N})}$ -BNNT. Distances and angles are given in Å and degrees, respectively.

**Table S3.** Relative energies with zero-point energy (ZPE) of N<sub>2</sub>O decomposition on Fe<sub>(B)</sub>-BNNT and Fe<sub>(N)</sub>-BNNT.

|                                            | Relative energy (kcal mol <sup>-1</sup> ) |               |              |
|--------------------------------------------|-------------------------------------------|---------------|--------------|
|                                            | Doublet state                             | Quartet state | Sextet state |
| Fe <sub>(B)</sub> -BNNT + N <sub>2</sub> O | 52.1                                      | 11.2          | 0.0          |
| Ads                                        | 5.2                                       | 2.1           | -12.9        |
| TS                                         | 15.5                                      | 9.6           | 12.3         |
| Prod                                       | -43.3                                     | -39.2         | -14.4        |
| FeO <sub>(B)</sub> -BNNT + N <sub>2</sub>  | -40.9                                     | -36.4         | -15.4        |
| Fe <sub>(N)</sub> -BNNT + N <sub>2</sub> O | 0.0                                       | 10.1          | 24.0         |
| Ads                                        | -25.0                                     | -3.1          | 1.9          |
| TS                                         | -25.2                                     | -19.2         | 4.8          |
| Prod                                       | -51.3                                     | -67.3         | -32.8        |
| FeO <sub>(N)</sub> -BNNT + N <sub>2</sub>  | -48.7                                     | -64.7         | -32.5        |
